# Supplementary material for: What can pKa and NBO charges of the ligands tell us about the water and thermal stability of metal organic frameworks?
Source: Royal Society of Chemistry journal article supplement (doi:10.1039/c4ta03154g), 2014-01-01
Supplement: c4ta03154g1.pdf [file c4ta03154g1.pdf]

## What can $pK_a$ and NBO charges of the ligands tell us about the water and thermal stability of metal organic frameworks?

Ping Lu,<sup>a</sup> Yong Wu,<sup>a</sup> Hong Kang,<sup>a</sup> Haiyan Wei,<sup>\*b</sup> Hongke Liu,<sup>b,d</sup> Min Fang<sup>\*a, c, d</sup>

<sup>a</sup> Department of Chemistry, School of Chemistry and Material Science, Nanjing Normal University, Nanjing 210023, China

<sup>b</sup> Jiangsu Key Laboratory of Biofunctional Materials, School of Chemistry and Material Science, Nanjing Normal University, Nanjing 210023, China

<sup>c</sup> Jiangsu Key Laboratory for NSLSCS, Nanjing Normal University, Nanjing 210023, China

<sup>d</sup> State Key Laboratory of Coordination Chemistry, Nanjing University, Nanjing 210093, China

Email addresses of corresponding authors: fangmin@njnu.edu.cn (M. Fang),  
weihaiyan@njnu.edu.cn (H. Wei)

### SUPPORTING INFORMATION

Taking the H<sub>2</sub>BDC for example, we give the calculation input files of the Gas phase geometries, the Solvation Gibbs energies ( $\Delta G_{\text{solv}}$ ) and the NBO charges as follows:

#### 1. the input file of the Gas phase geometries

```
%chk=freqH2BDC
```

```
%mem=20000000
```

```
%nproc=8
```

```
# B3LYP/6-31+g(d,p) opt freq
```

```
freqH2BDC
```

```
0 1
```

```
6          0.665594    1.230542   -0.000019
```

```
6         -0.726121    1.198900   -0.000004
```

```
6         -1.397219   -0.034047    0.000011
```

```
6         -0.665594   -1.230542    0.000018
```

```
6          0.726121   -1.198900    0.000002
```

|   |           |           |           |
|---|-----------|-----------|-----------|
| 6 | 1.397219  | 0.034047  | -0.000013 |
| 1 | 1.201341  | 2.174228  | -0.000026 |
| 1 | -1.294009 | 2.122594  | -0.000025 |
| 1 | -1.201341 | -2.174228 | 0.000024  |
| 1 | 1.294009  | -2.122594 | 0.000024  |
| 6 | -2.884608 | -0.123018 | 0.000000  |
| 8 | -3.518330 | -1.160535 | -0.000017 |
| 8 | -3.489973 | 1.092519  | 0.000014  |
| 1 | -4.451317 | 0.928524  | -0.000007 |
| 6 | 2.884608  | 0.123018  | -0.000001 |
| 8 | 3.518330  | 1.160535  | 0.000019  |
| 8 | 3.489973  | -1.092519 | -0.000012 |
| 1 | 4.451317  | -0.928524 | 0.000011  |

## 2. The input file of the calculated $\Delta G_{\text{solv}}$

%chk=solH<sub>2</sub>BDC

%mem=20000000

%nproc=8

# B3LYP/6-31+g(d,p) SCF=Tight SCRF=(SMD,solvent=water,externalIteration,dovacuum)

solH<sub>2</sub>BDC

0 1

|   |           |           |           |
|---|-----------|-----------|-----------|
| 6 | -0.666105 | 1.230188  | 0.000011  |
| 6 | 0.725474  | 1.199321  | 0.000012  |
| 6 | 1.396807  | -0.033338 | -0.000001 |
| 6 | 0.666105  | -1.230188 | -0.000012 |
| 6 | -0.725474 | -1.199321 | -0.000014 |
| 6 | -1.396807 | 0.033338  | -0.000001 |
| 1 | -1.203172 | 2.172391  | 0.000019  |
| 1 | 1.293233  | 2.122316  | 0.000019  |

|   |           |           |           |
|---|-----------|-----------|-----------|
| 1 | 1.203172  | -2.172391 | -0.000021 |
| 1 | -1.293233 | -2.122316 | -0.000021 |
| 6 | 2.884385  | -0.122404 | -0.000004 |
| 8 | 3.516888  | -1.160610 | 0.000010  |
| 8 | 3.490691  | 1.092017  | -0.000002 |
| 1 | 4.448388  | 0.926573  | 0.000007  |
| 6 | -2.884385 | 0.122404  | 0.000001  |
| 8 | -3.516888 | 1.160610  | -0.000007 |
| 8 | -3.490691 | -1.092017 | 0.000005  |
| 1 | -4.448388 | -0.926573 | -0.000001 |

### 3. The input file of the calculated NBO charges

First we did the optimization and frequency calculation of BDC<sup>2-</sup> using the same method as we did with H<sub>2</sub>BDC (1), then we did the NBO charges based on the obtained geometry as follows:

```
%chk=nboBDC
```

```
%mem=20000000
```

```
%nproc=8
```

```
# B3LYP/6-31+g(d,p) pop=nbo
```

```
nboBDC
```

```
-2 1
```

|   |           |           |           |
|---|-----------|-----------|-----------|
| 6 | -0.700019 | -1.199425 | 0.000014  |
| 6 | 0.700017  | -1.199444 | 0.000061  |
| 6 | 1.430691  | -0.000013 | 0.000080  |
| 6 | 0.700006  | 1.199424  | 0.000054  |
| 6 | -0.700031 | 1.199444  | 0.000014  |
| 6 | -1.430700 | 0.000013  | -0.000009 |
| 1 | -1.262233 | -2.129660 | -0.000006 |
| 1 | 1.262226  | -2.129679 | 0.000080  |

|   |           |           |           |
|---|-----------|-----------|-----------|
| 1 | 1.262218  | 2.129659  | 0.000070  |
| 1 | -1.262241 | 2.129679  | -0.000002 |
| 6 | 2.977795  | -0.000001 | 0.000129  |
| 8 | 3.538983  | 1.134412  | -0.000124 |
| 8 | 3.539111  | -1.134359 | -0.000135 |
| 6 | -2.977795 | -0.000001 | -0.000058 |
| 8 | -3.538970 | -1.134418 | 0.000061  |
| 8 | -3.539093 | 1.134367  | -0.000032 |

### NBO Charges of all the ligands

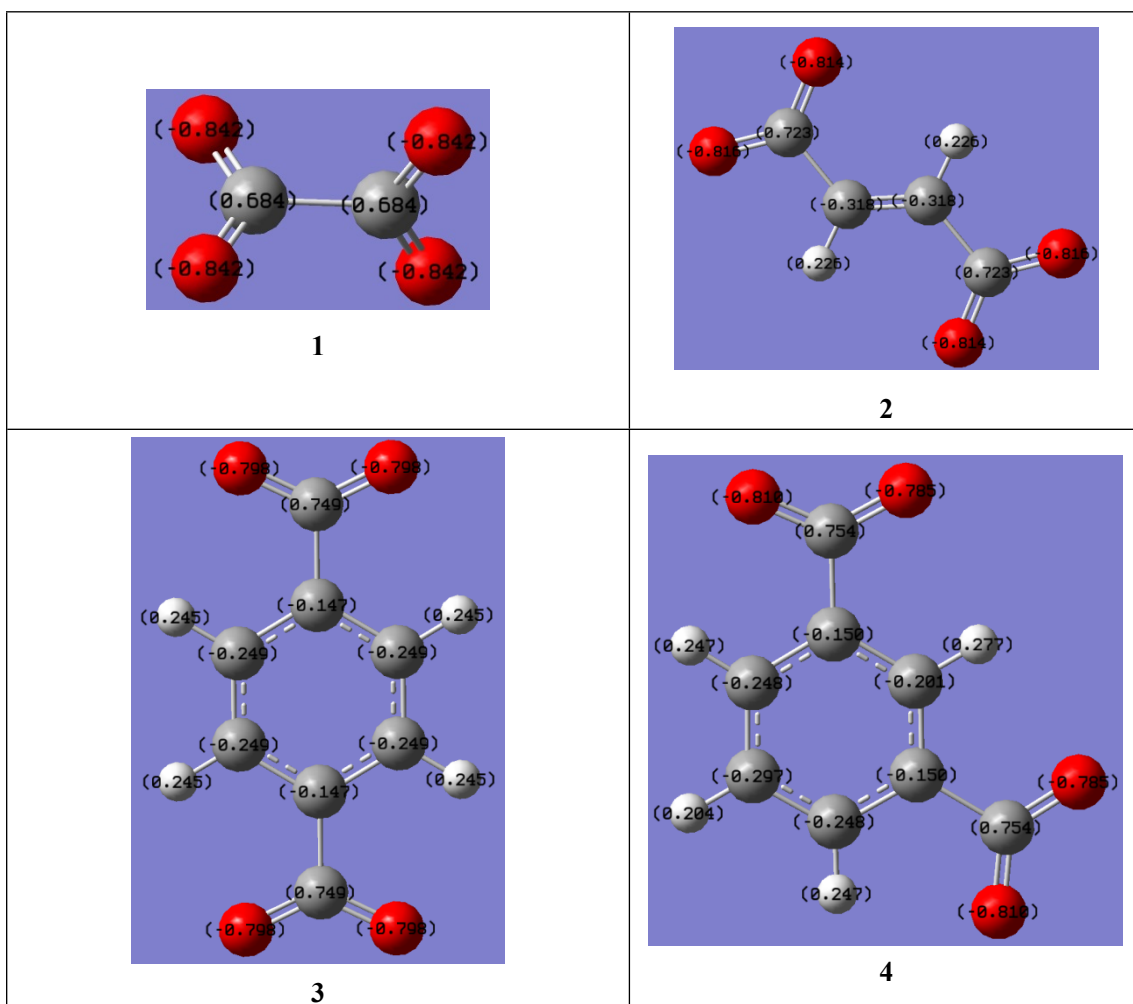

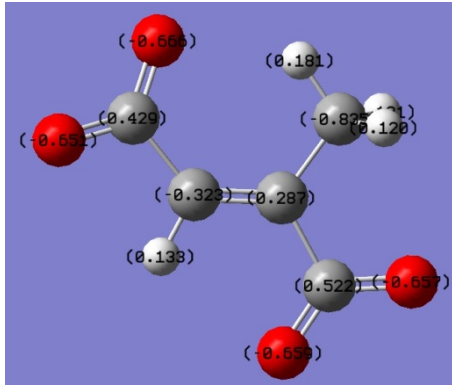

5

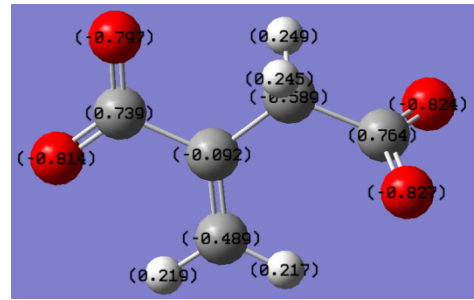

6

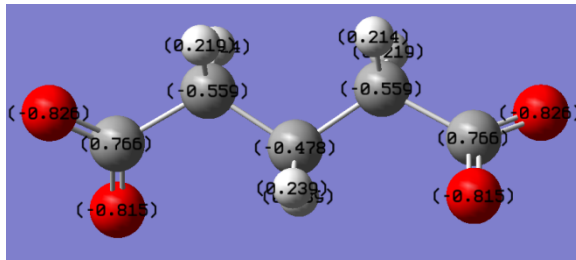

7

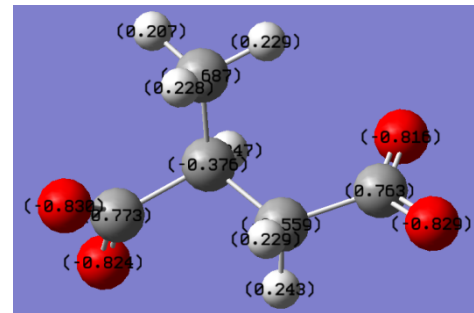

8

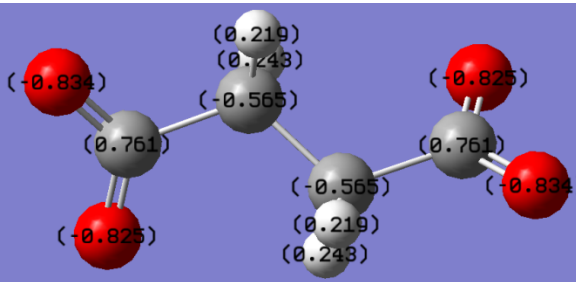

9

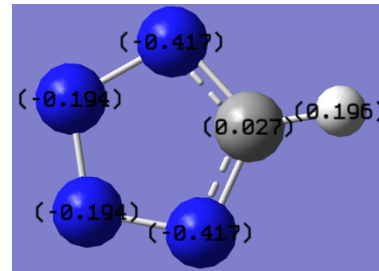

10

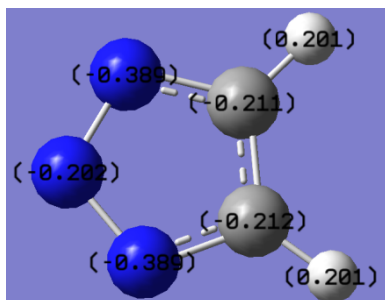

11

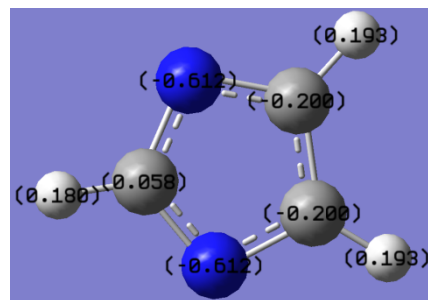

12

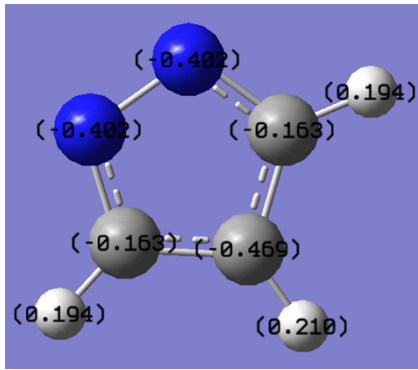

13

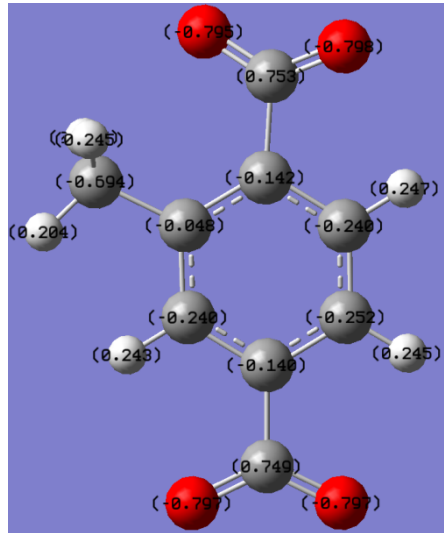

14

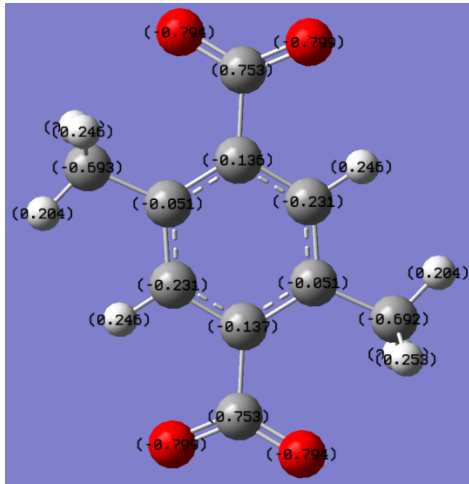

15

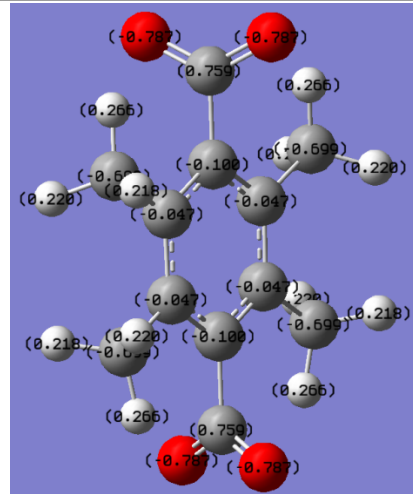

16

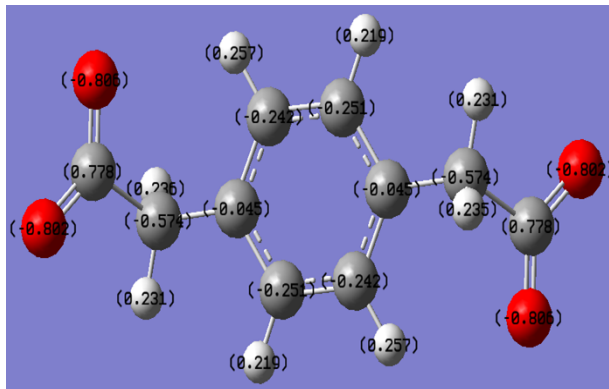

17

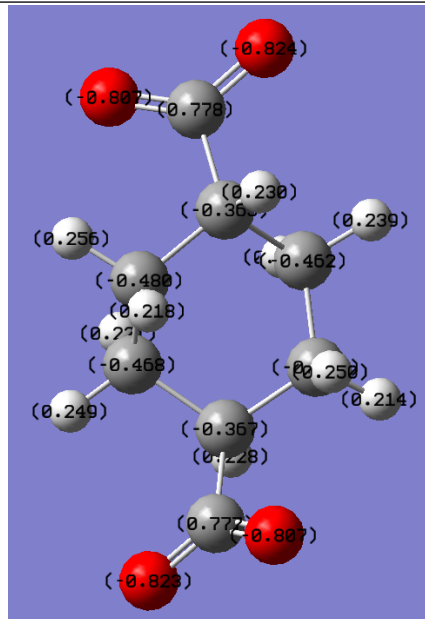

18

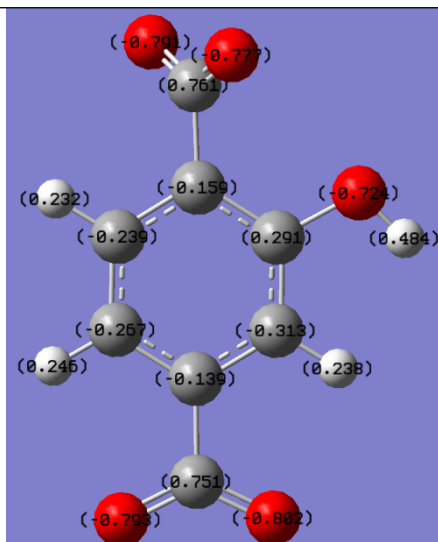

19a

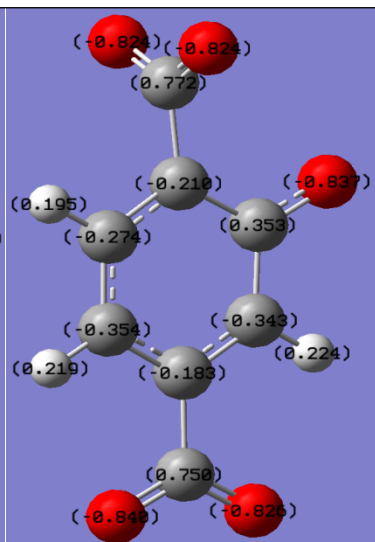

19b

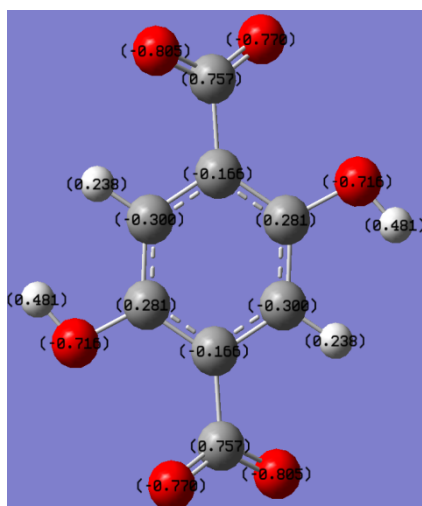

20a

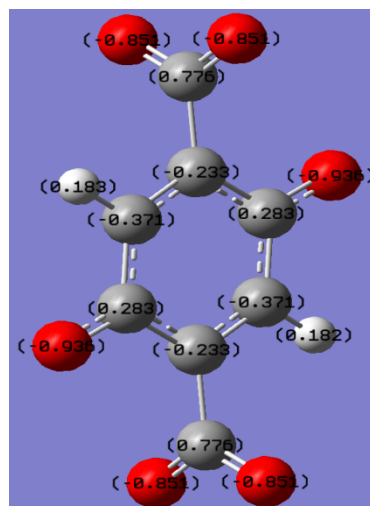

20b

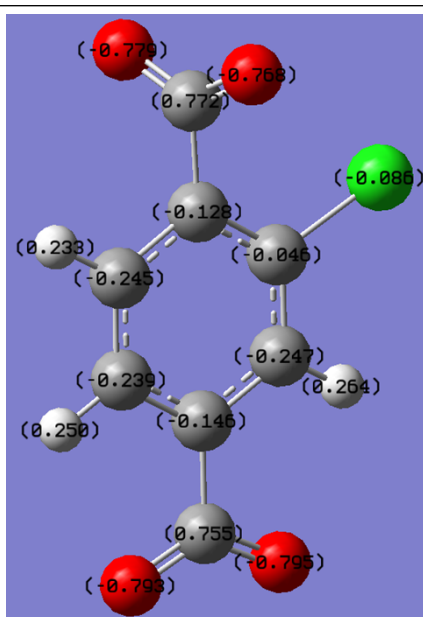

21

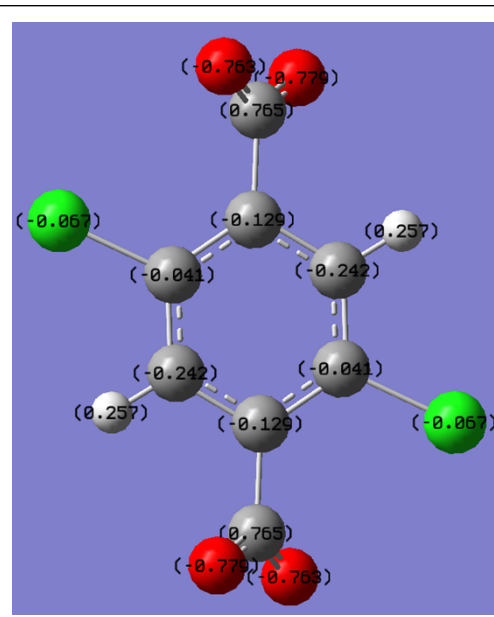

22

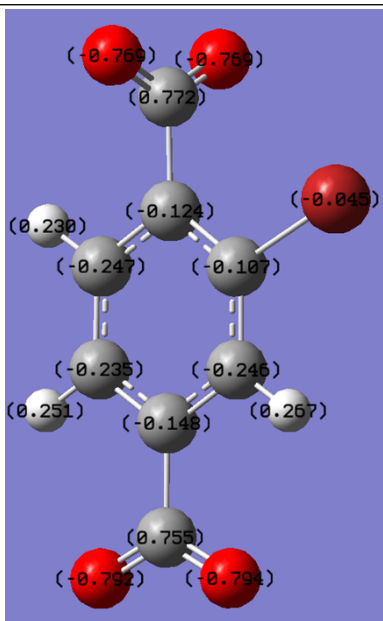

23

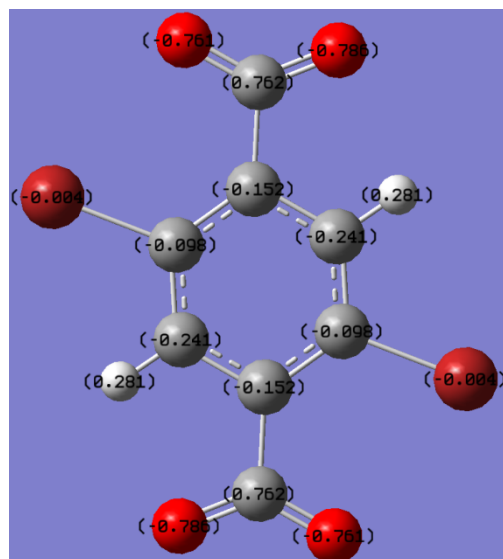

24

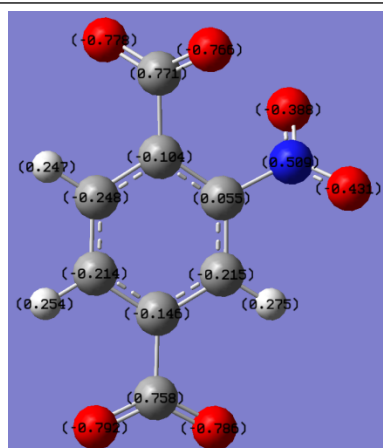

25

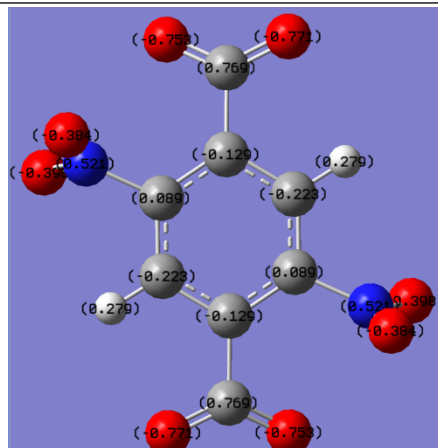

26

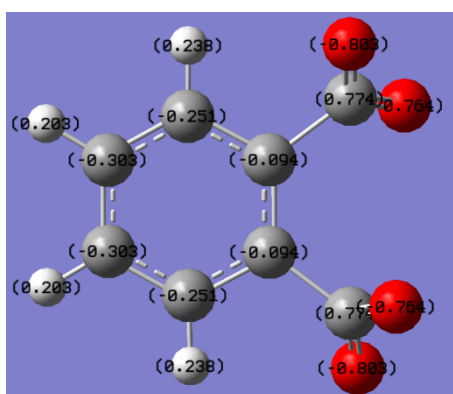

27

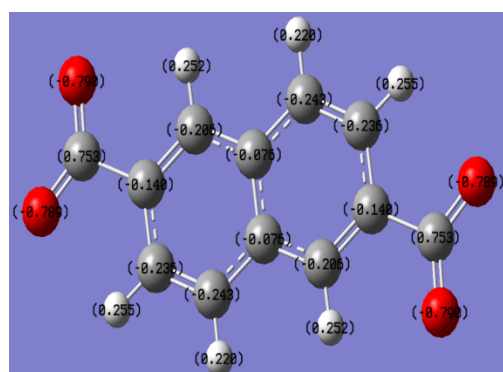

28



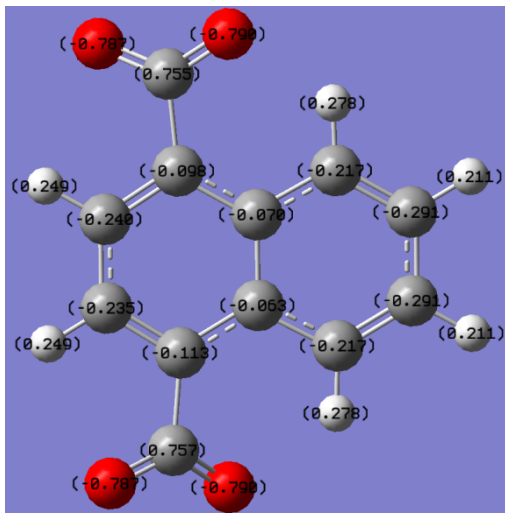

29

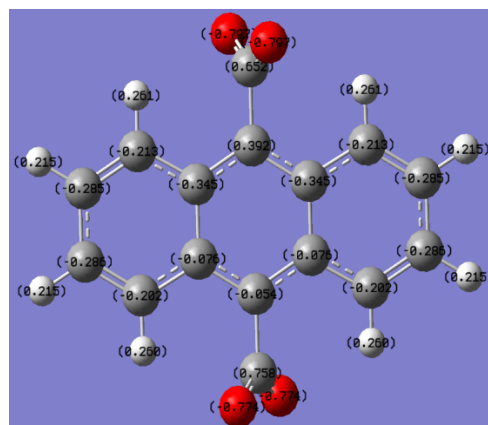

30

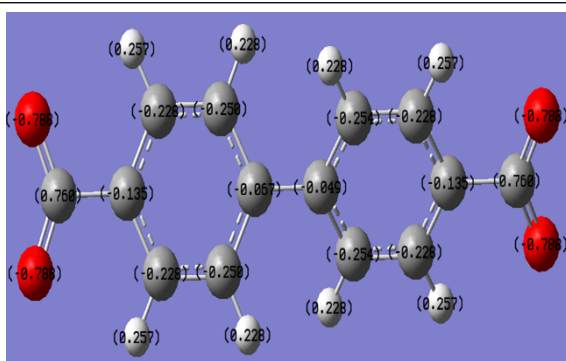

31

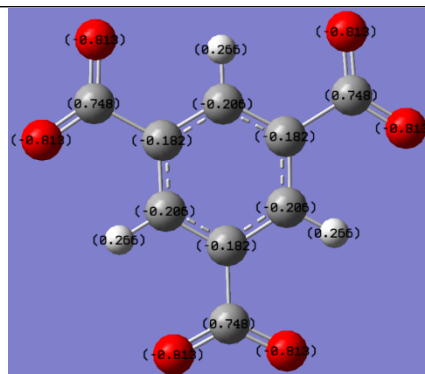

32

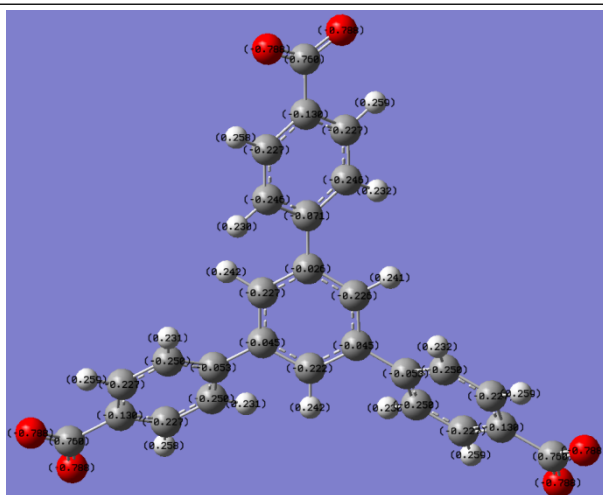

33

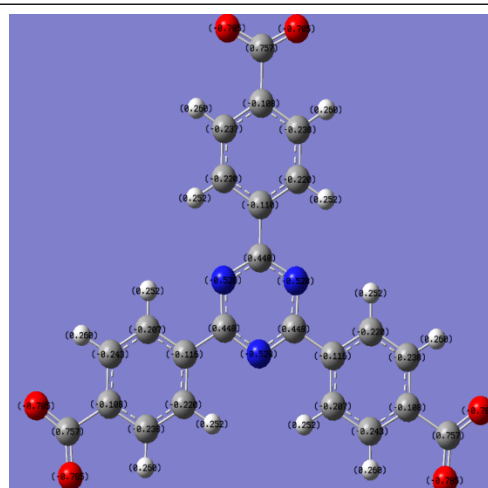

34

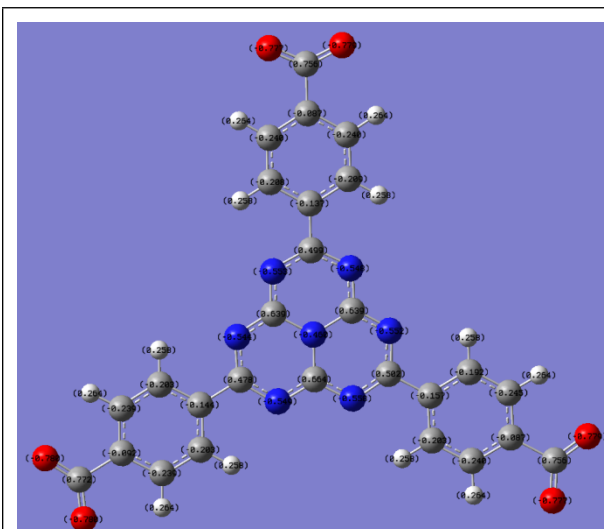

35

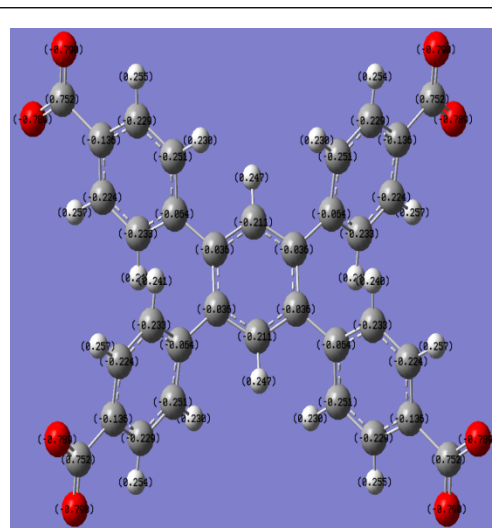

36

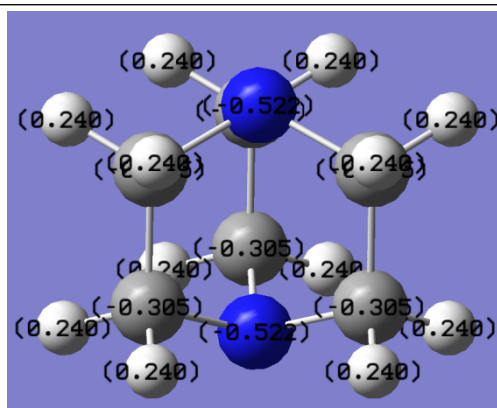

37

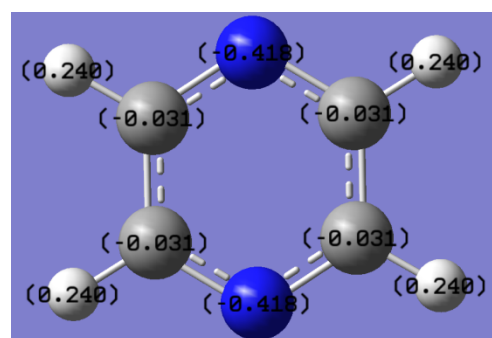

38

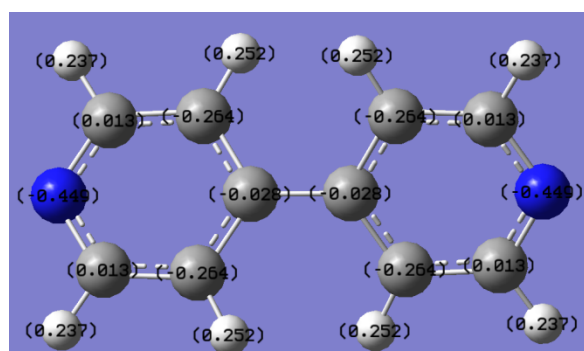

39

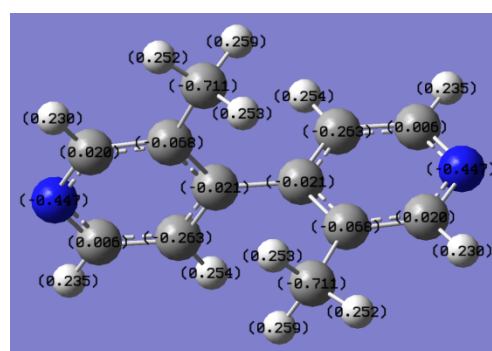

40

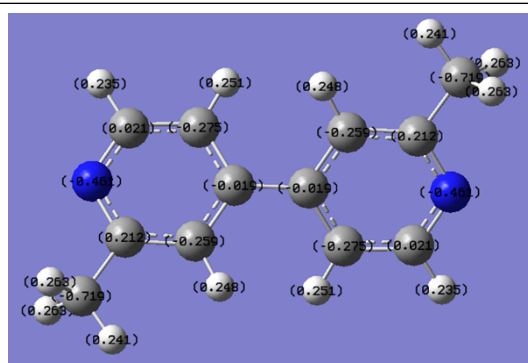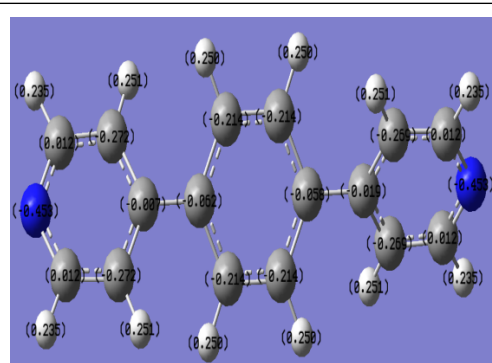

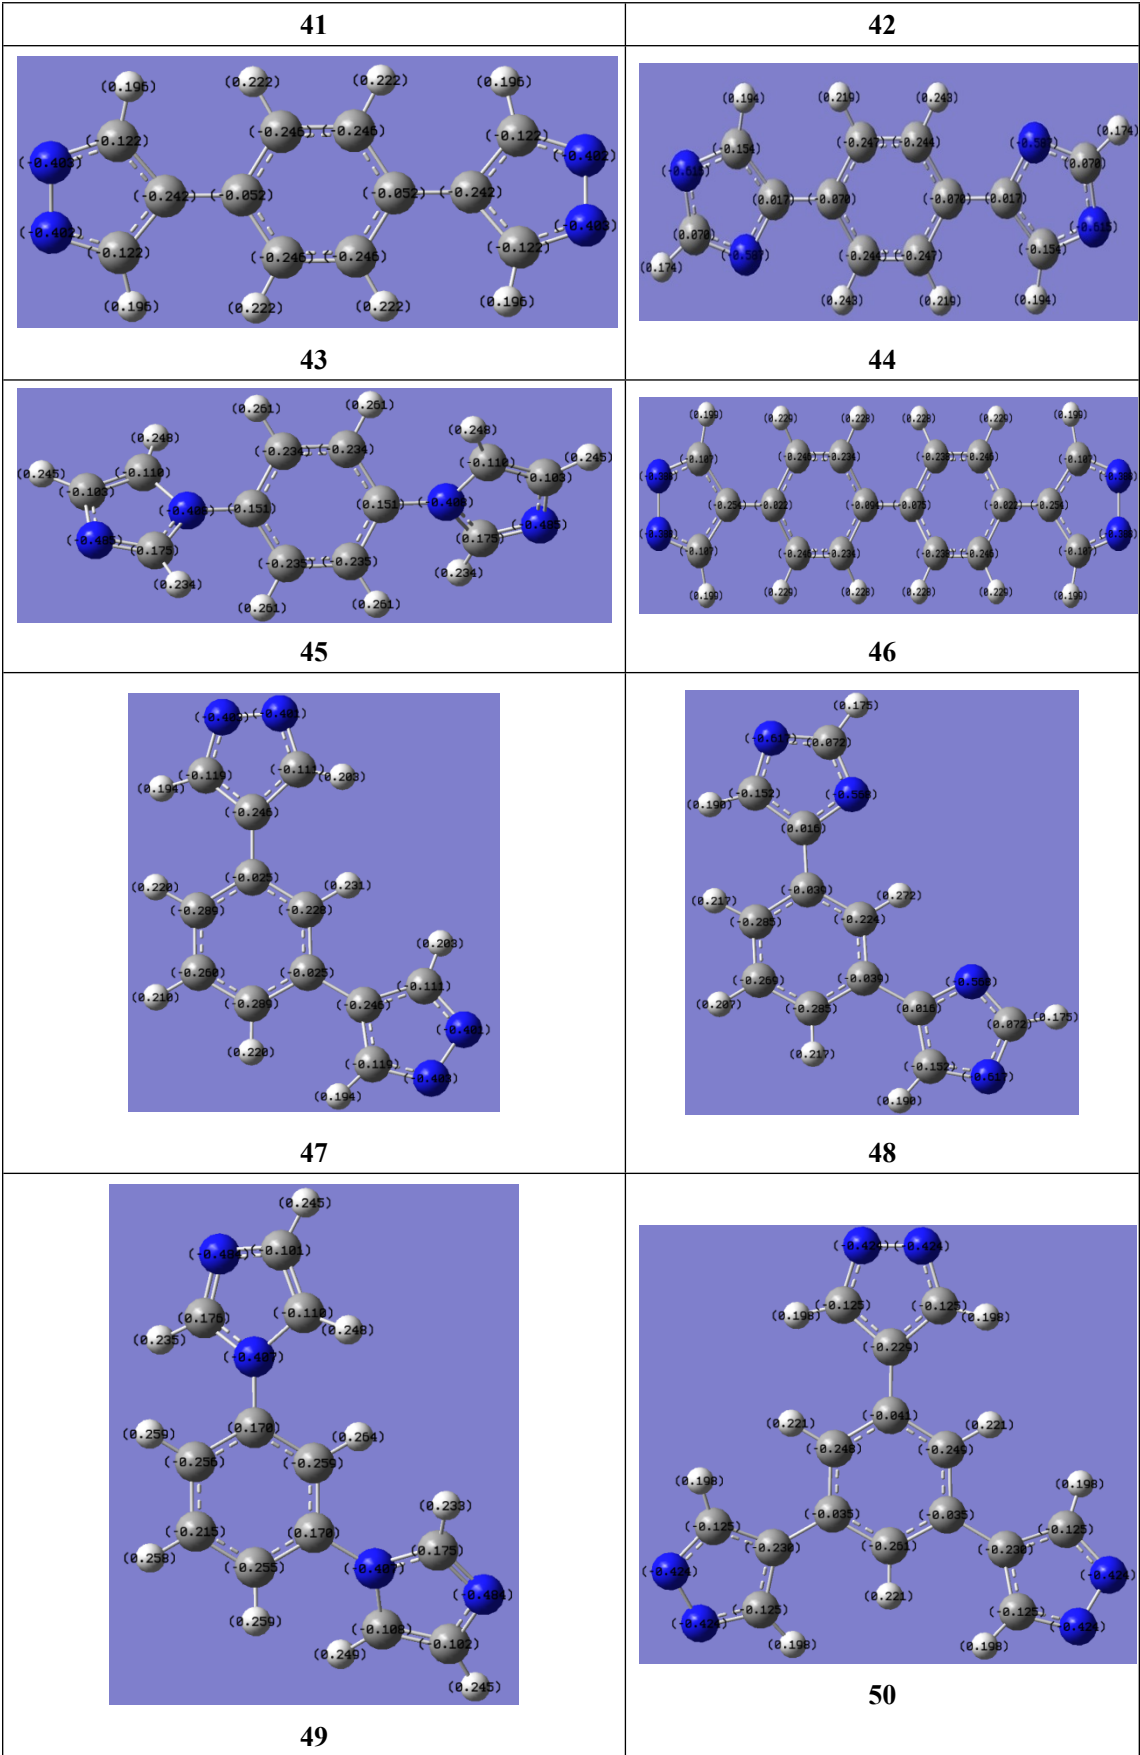

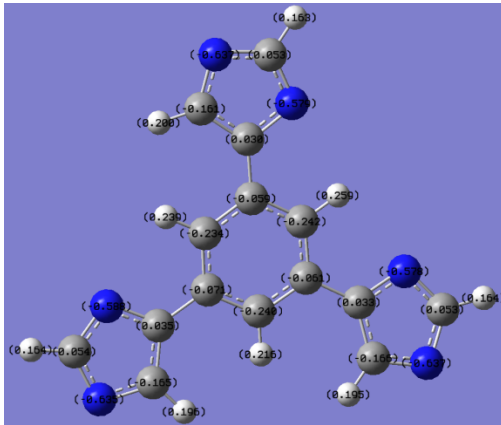

51

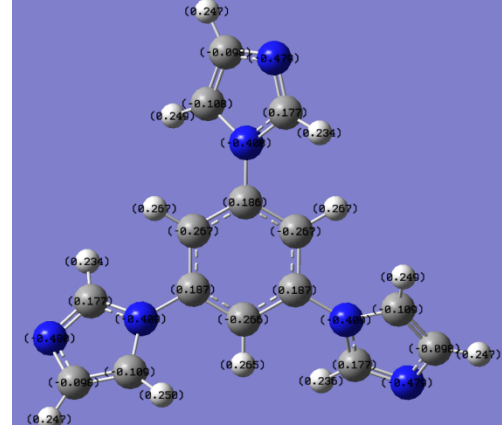

52

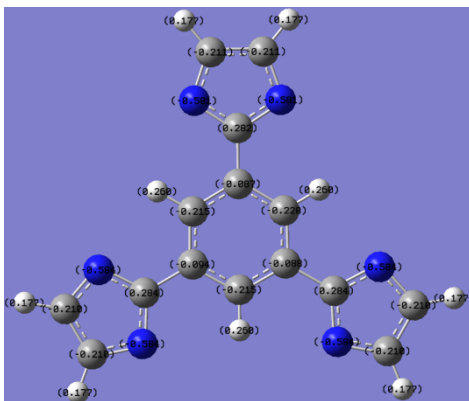

53

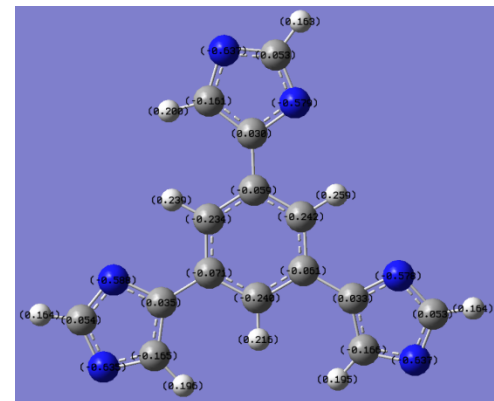

54

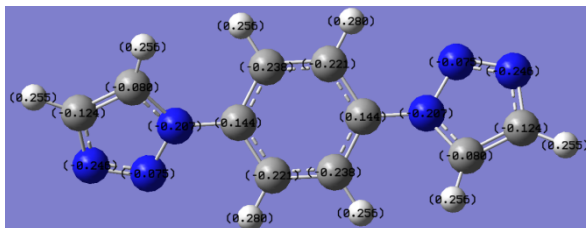

55

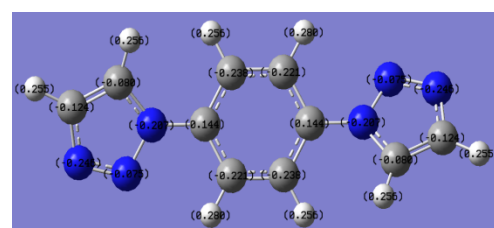

56

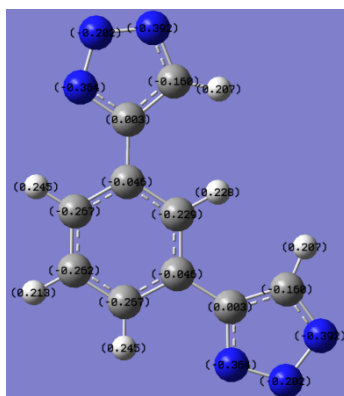

57

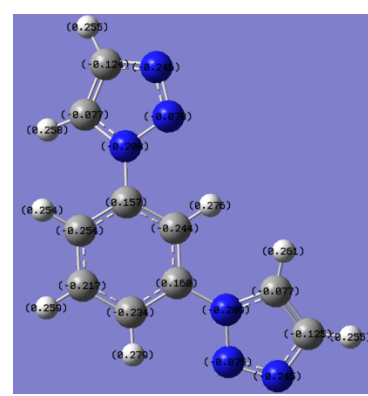

58

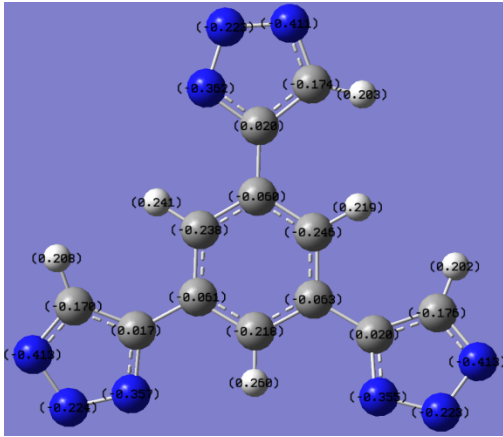

59

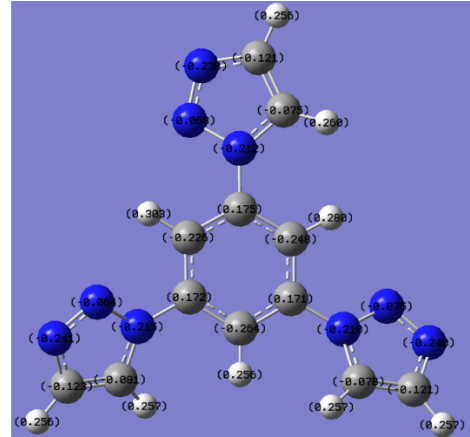

60

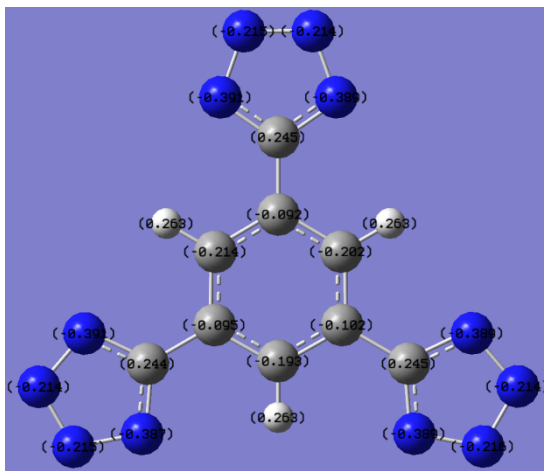

61

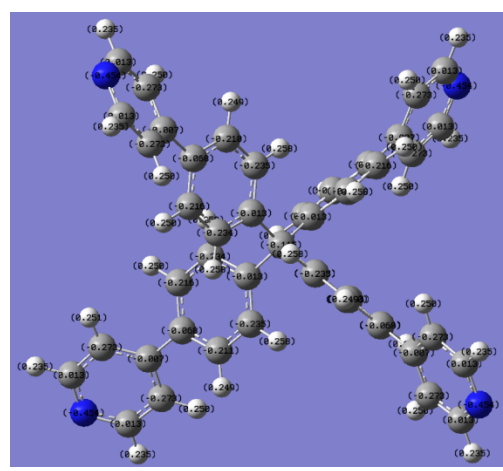

62

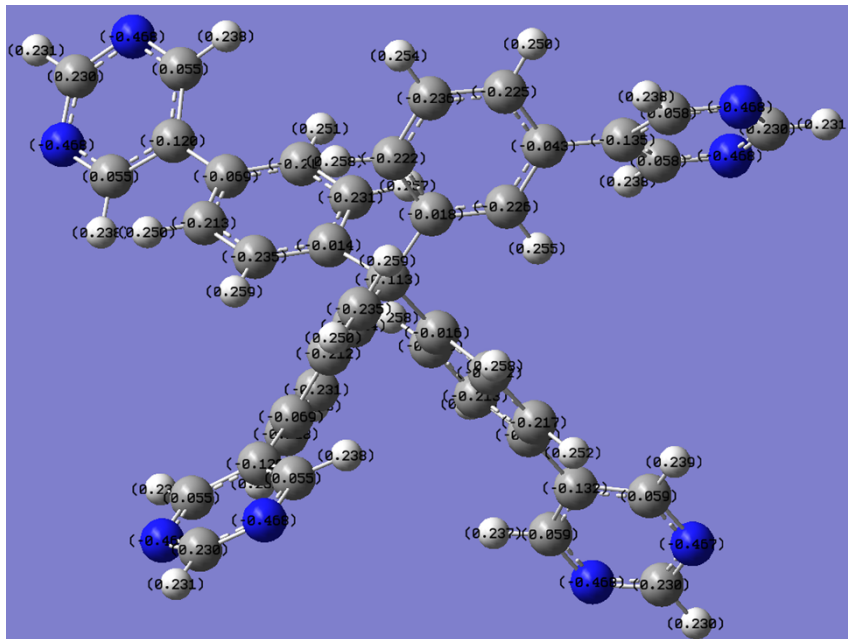

63
